# Supplementary material for: With complements of the ligands: an unusual S-shaped [Mn7]2 assembly from tethered calixarenes
Source: Royal Society of Chemistry journal article supplement (doi:10.1039/d0dt01766c), 2020-01-01
Supplement: d0dt01766c1.pdf [file d0dt01766c1.pdf]

## Supporting information

### With complements of the ligands: an unusual S-shaped [Mn<sub>7</sub>]<sub>2</sub> assembly from tethered calixarenes

| metal VBS            | d(M-L1)  | d(M-L2)  | d(M-L3)  | d(M-L4)   | d(M-L5)  | r(0) | beta |
|----------------------|----------|----------|----------|-----------|----------|------|------|
| <b>Mn1</b>           | 1.891    | 1.934    | 1.953    | 1.916     | 2.083    | 1.76 | 0.37 |
|                      | -0.131   | -0.174   | -0.193   | -0.156    | -0.323   |      |      |
|                      | -0.35405 | -0.47027 | -0.52162 | -0.421622 | -0.87297 |      |      |
|                      | 0.701837 | 0.624833 | 0.593557 | 0.6559822 | 0.417708 |      |      |
| <b>Mn1(Qx.State)</b> | 2.993918 |          |          |           |          |      |      |

| metal VBS            | d(M-L1)  | d(M-L2)  | d(M-L3)  | d(M-L4)   | d(M-L5)  | d(M-L6)  | r(0) | beta |
|----------------------|----------|----------|----------|-----------|----------|----------|------|------|
| <b>Mn2</b>           | 2.206    | 2.204    | 1.946    | 1.937     | 1.917    | 1.94     | 1.76 | 0.37 |
|                      | -0.446   | -0.444   | -0.186   | -0.177    | -0.157   | -0.18    |      |      |
|                      | -1.20541 | -1.2     | -0.5027  | -0.478378 | -0.42432 | -0.48649 |      |      |
|                      | 0.299571 | 0.301194 | 0.604894 | 0.6197876 | 0.654212 | 0.614783 |      |      |
| <b>Mn2(Qx.State)</b> | 3.09444  |          |          |           |          |          |      |      |

| metal VBS            | d(M-L1)  | d(M-L2)  | d(M-L3)  | d(M-L4)   | d(M-L5)  | d(M-L6)  | r(0) | beta |
|----------------------|----------|----------|----------|-----------|----------|----------|------|------|
| <b>Mn3</b>           | 2.119    | 1.981    | 1.973    | 1.916     | 1.916    | 1.94     | 1.76 | 0.37 |
|                      | -0.359   | -0.221   | -0.213   | -0.156    | -0.156   | -0.18    |      |      |
|                      | -0.97027 | -0.5973  | -0.57568 | -0.421622 | -0.42162 | -0.48649 |      |      |
|                      | 0.378981 | 0.550297 | 0.562325 | 0.6559822 | 0.655982 | 0.614783 |      |      |
| <b>Mn3(Qx.State)</b> | 2.803567 |          |          |           |          |          |      |      |

| metal VBS            | d(M-L1)  | d(M-L2)  | d(M-L3)  | d(M-L4)  | d(M-L5)  | r(0) | beta |
|----------------------|----------|----------|----------|----------|----------|------|------|
| <b>Mn4</b>           | 2.116    | 2.208    | 2.155    | 2.191    | 2.19     | 1.79 | 0.37 |
|                      | -0.326   | -0.418   | -0.365   | -0.401   | -0.4     |      |      |
|                      | -0.88108 | -1.12973 | -0.98649 | 1.083784 | -1.08108 |      |      |
|                      | 0.414335 | 0.323121 | 0.372885 | 0.338313 | 0.339229 |      |      |
| <b>Mn4(Qx.State)</b> | 1.787881 |          |          |          |          |      |      |

| metal VBS            | d(M-L1)  | d(M-L2)  | d(M-L3) | d(M-L4)   | d(M-L5) | r(0) | beta |
|----------------------|----------|----------|---------|-----------|---------|------|------|
| <b>Mn5</b>           | 2.128    | 2.218    | 2.17    | 2.161     | 2.187   | 1.79 | 0.37 |
|                      | -0.338   | -0.428   | -0.38   | -0.371    | -0.397  |      |      |
|                      | -0.91351 | -1.15676 | 1.02703 | -1.002703 | 1.07297 |      |      |
|                      | 0.401112 | 0.314505 | 0.35807 | 0.3668865 | 0.34199 |      |      |
| <b>Mn5(Qx.State)</b> | 1.782564 |          |         |           |         |      |      |

| metal VBS            | d(M-L1)  | d(M-L2)  | d(M-L3)  | d(M-L4)   | d(M-L5)  | d(M-L6)  | r(0) | beta |
|----------------------|----------|----------|----------|-----------|----------|----------|------|------|
| <b>Mn6</b>           | 2.284    | 2.189    | 2.005    | 1.906     | 1.869    | 1.934    | 1.76 | 0.37 |
|                      | -0.524   | -0.429   | -0.245   | -0.146    | -0.109   | -0.174   |      |      |
|                      | -1.41622 | -1.15946 | -0.66216 | -0.394595 | -0.29459 | -0.47027 |      |      |
|                      | 0.24263  | 0.313656 | 0.515735 | 0.6739532 | 0.744833 | 0.624833 |      |      |
| <b>Mn6(Qx.State)</b> | 3.115641 |          |          |           |          |          |      |      |

| metal VBS            | d(M-L1)  | d(M-L2)  | d(M-L3)  | d(M-L4) | d(M-L5)  | d(M-L6)  | r(0) | beta |
|----------------------|----------|----------|----------|---------|----------|----------|------|------|
| <b>Mn7</b>           | 2.292    | 2.171    | 1.865    | 1.908   | 2.027    | 1.913    | 1.76 | 0.37 |
|                      | -0.532   | -0.411   | -0.105   | -0.148  | -0.267   | -0.153   |      |      |
|                      | -1.43784 | -1.11081 | -0.28378 | -0.4    | -0.72162 | -0.41351 |      |      |
|                      | 0.237441 | 0.329292 | 0.752929 | 0.67032 | 0.485964 | 0.661323 |      |      |
| <b>Mn7(Qx.State)</b> | 3.137268 |          |          |         |          |          |      |      |

**Figure S1.** Bond Valence Sum calculations for Mn centres in compound **6**.
